# Supplementary material for: A Stromal-Immune Gene Signature for Precision Prognosis and Therapeutic Guidance in Gastric Cancer
Source: Research Square preprint supplement (doi:10.21203/rs.3.rs-8596508/v1), 2026-02-16
Supplement: Supplementary file 1 [file 9f61b034bf4276562b37bf14.docx]

**Supplementary Table 1: Univariate and multivariate Cox regression analysis of OS in TCGA-STAD cohort**

| Variable | Univariate HR (95% Confidence Interval) | Univariate P-value | Multivariate HR (95% Confidence Interval) | Multivariate P-value |
| --- | --- | --- | --- | --- |
| ECM signature (high vs. low) | 1.92 (1.51–2.44) | <0.001 | 1.62 (1.35–1.95) | <0.001 |
| Age (>65 vs. ≤65 years) | 1.21 (0.98–1.49) | 0.08 | 1.15 (0.93–1.42) | 0.20 |
| Gender (male vs. female) | 1.12 (0.90–1.39) | 0.31 | — | — |
| AJCC stage (Ⅲ–Ⅳ vs. Ⅰ–Ⅱ) | 1.78 (1.43–2.22) | <0.001 | 1.53 (1.21–1.93) | <0.001 |
| T stage (T3–T4 vs. T1–T2) | 1.65 (1.32–2.06) | <0.001 | 1.38 (1.09–1.75) | 0.008 |
| N stage (N1–N3 vs. N0) | 1.52 (1.21–1.91) | <0.001 | 1.12 (0.89–1.41) | 0.34 |
| M stage (M1 vs. M0) | 2.05 (1.48–2.84) | <0.001 | 1.87 (1.34–2.61) | <0.001 |

Note: HR = Hazard Ratio; TCGA-STAD = The Cancer Genome Atlas-Stomach Adenocarcinoma; "—" indicates variable not included in multivariate analysis (due to non-significant univariate result or collinearity).

**Supplemental Figures
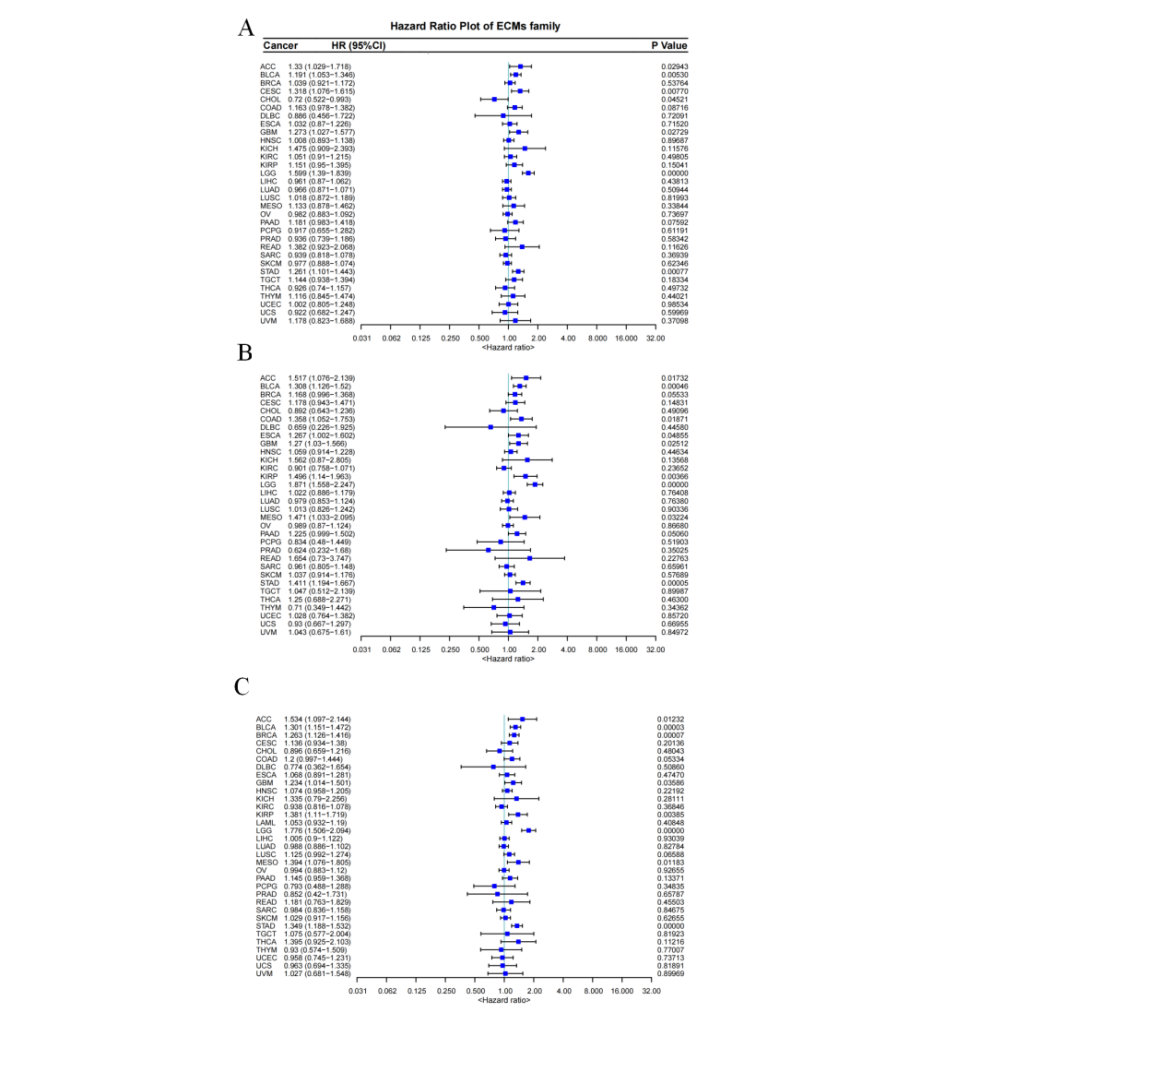
**

**Figure S1** **Cox analysis of the 7-gene ECM-immune signature in pan-cancers.** (A) Overall Survival (OS). (B) Disease Specific Survival (DSS). (C) Progression Free Interval (PFI).

**
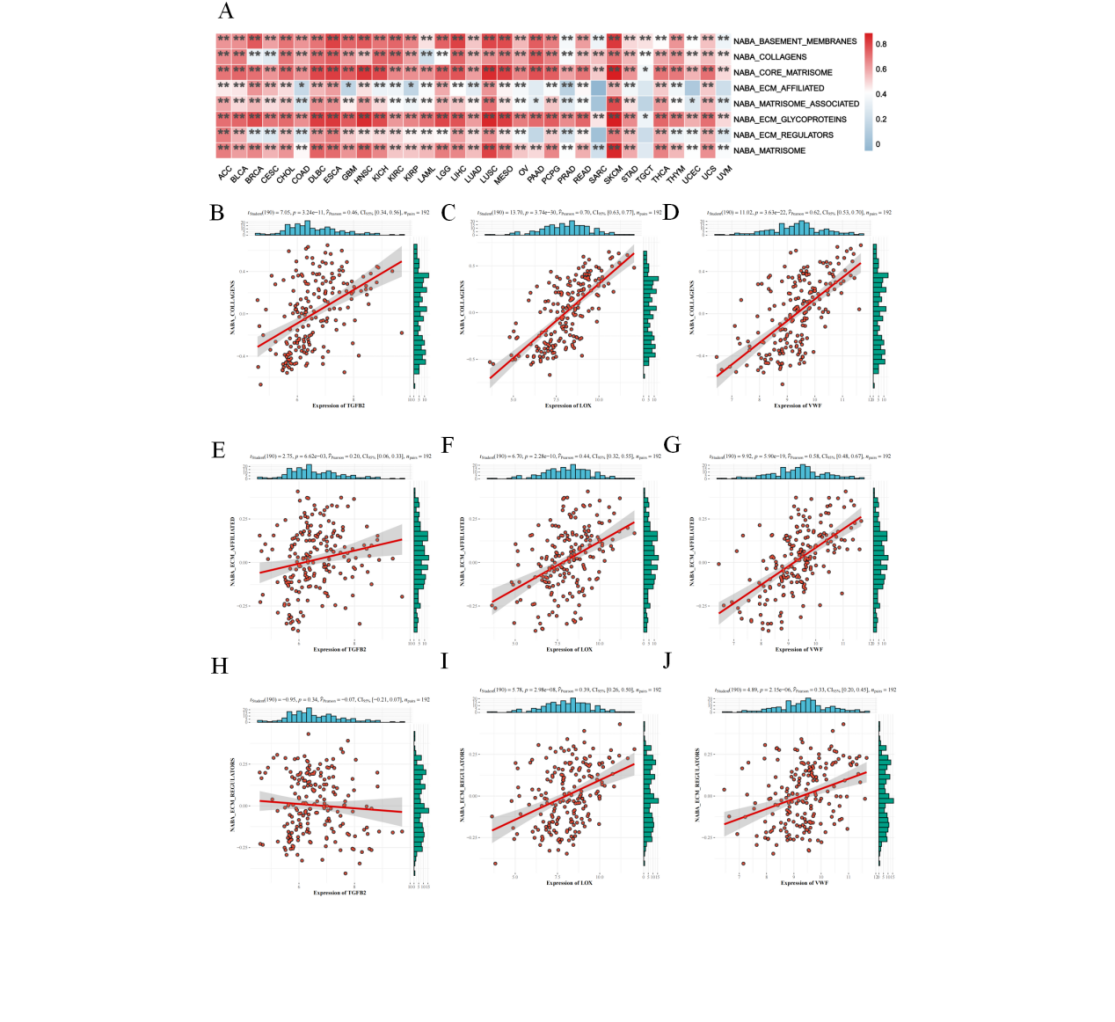
**

**Figure S2 Correlation heatmap between the 7 signature genes and ECM-related pathways.**
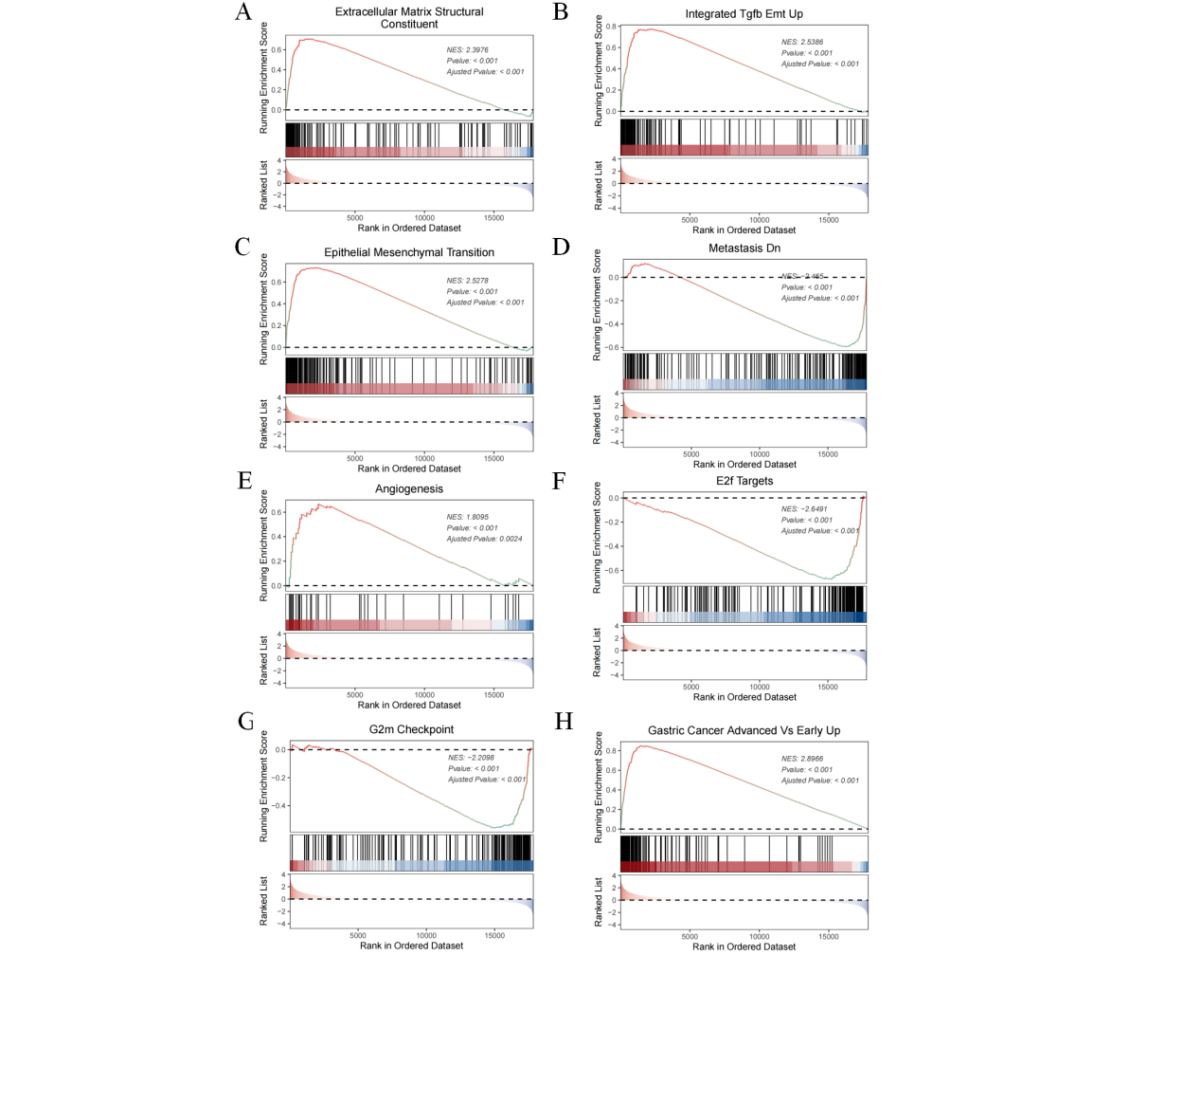


**Figure S3 GSEA of DEGs in high-risk vs. low-risk GC.** (A) Extracellular Matrix Structural Constituent; (B) Integrated TGFβ EMT Up; (C) Epithelial Mesenchymal Transition; (D) Metastasis Dn; (E) Angiogenesis; (F) E2F Targets; (G) G2M Checkpoint; (H) Gastric Cancer Advanced Vs Early Up.

**
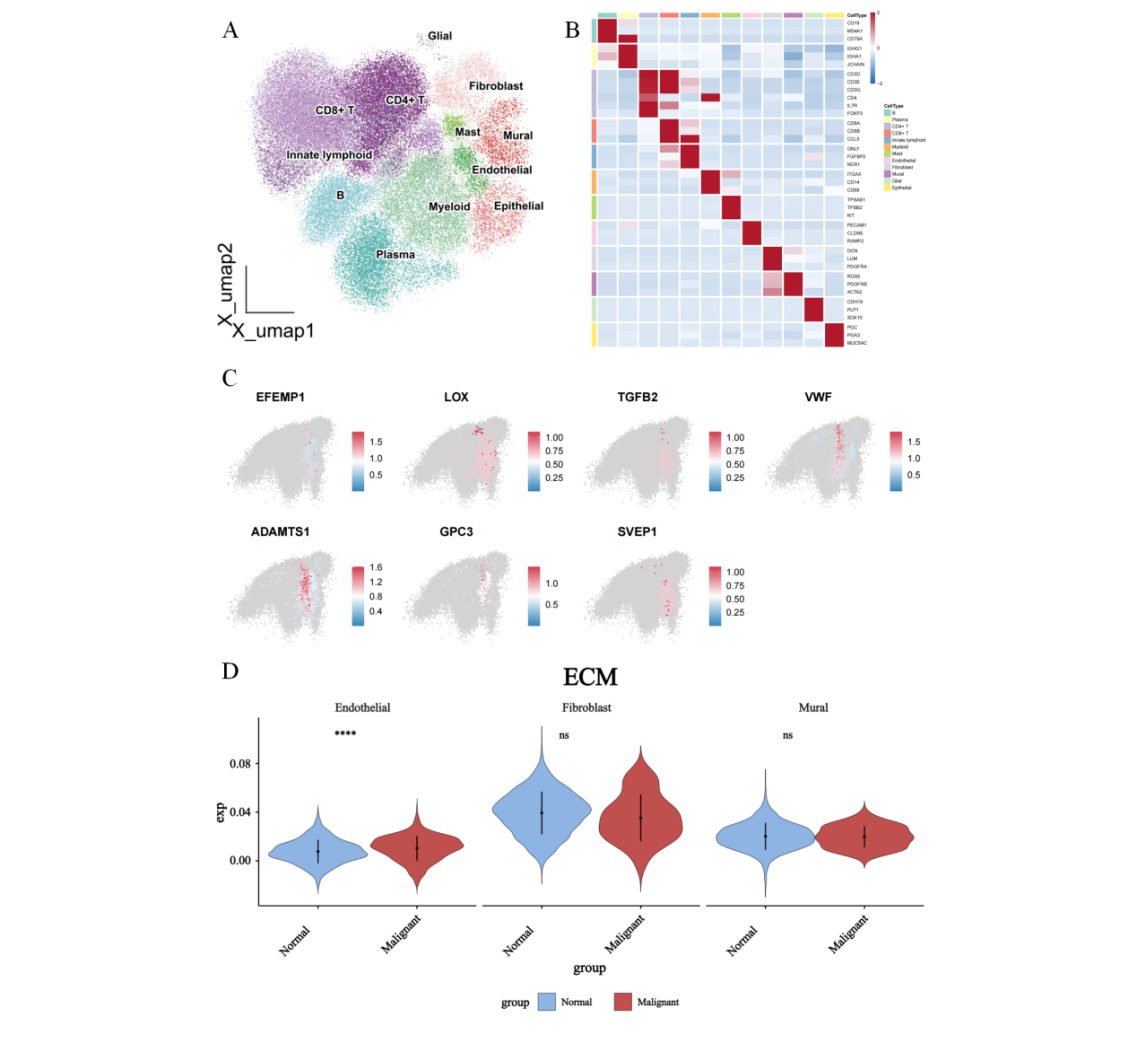
**

**Figure S4 Single-cell-level cell typing and ECM activity localization.** (A) UMAP of cell types in GC tissues. (B) Heatmap of cell-type markers. (C) Cumulative expression of signature genes in stromal cells. (D) ECM scores of stromal cells by copykat grouping.

**
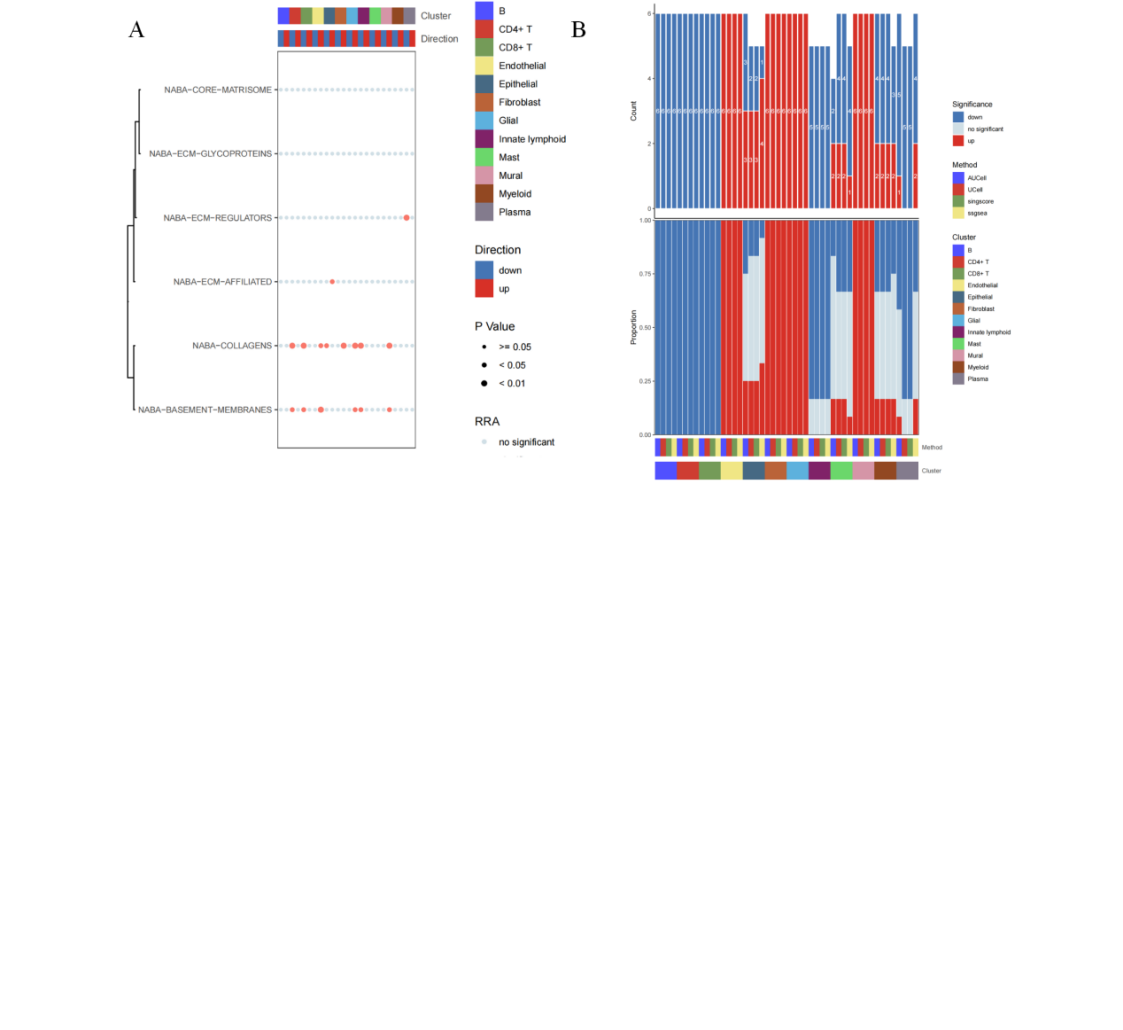
**

**Figure S5 Module analysis of ECM-related gene sets in stromal cells.** (A-B) WGCNA showing enhanced ECM gene set activity in stromal cells vs. other cell


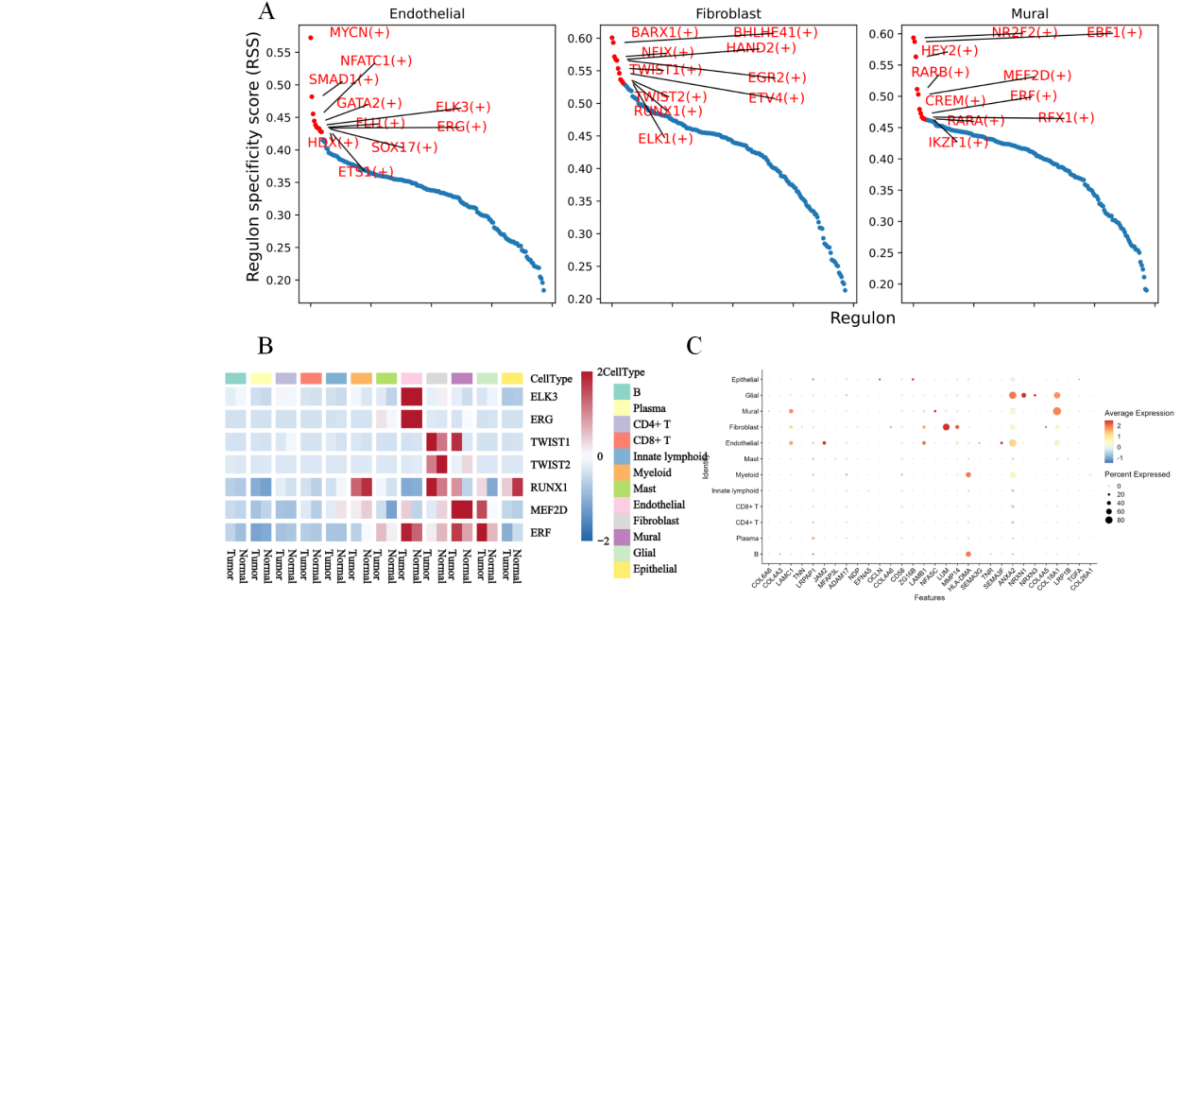


**Figure S6 Regulatory mechanisms of ECM activity in stromal cells.** (A) Top 10 TFs regulating ECM activity (Pyscenic analysis). (B) Heatmap of ECM-associated TFs. (C) Top 20 ligand-receptor pairs in high-ECM GC (CellChat analysis).
